# Supplementary material for: Facile preparation of nitrogen-doped carbon nanosheets from CO2 for potassium-ion storage
Source: Royal Society of Chemistry journal article supplement (doi:10.1039/d2qm00443g), 2022-01-01
Supplement: d2qm00443g1.pdf [file d2qm00443g1.pdf]

## *Supporting Information*

### **Facile preparation of Nitrogen-doped carbon nanosheets from CO<sub>2</sub> for potassium ion storage**

Chunyan Wang,<sup>a, b</sup> Dandan Ouyang,<sup>a, d</sup> Kang Sun,<sup>c</sup> Hui Zhu,<sup>a, \*</sup> and Jiao Yin<sup>a, \*</sup>

<sup>a</sup> Laboratory of Environmental Sciences and Technology, Xinjiang Technical Institute of Physics & Chemistry, and Key Laboratory of Functional Materials and Devices for Special Environments, Chinese Academy of Sciences, Urumqi 830011, China

<sup>b</sup> University of Chinese Academy of Sciences, Beijing 100049, China

<sup>c</sup> Institute of Chemical Industry of Forest Products, CAF, National Engineering Lab for Biomass Chemical Utilization, Nanjing 210042, China

<sup>d</sup> School of Chemistry and Chemical Engineering, Shihezi University, Shihezi 832003, P.R. China

Corresponding author:

huizhu@ms.xjb.ac.cn (H. Zhu), yinjiao@ms.xjb.ac.cn (J. Yin)

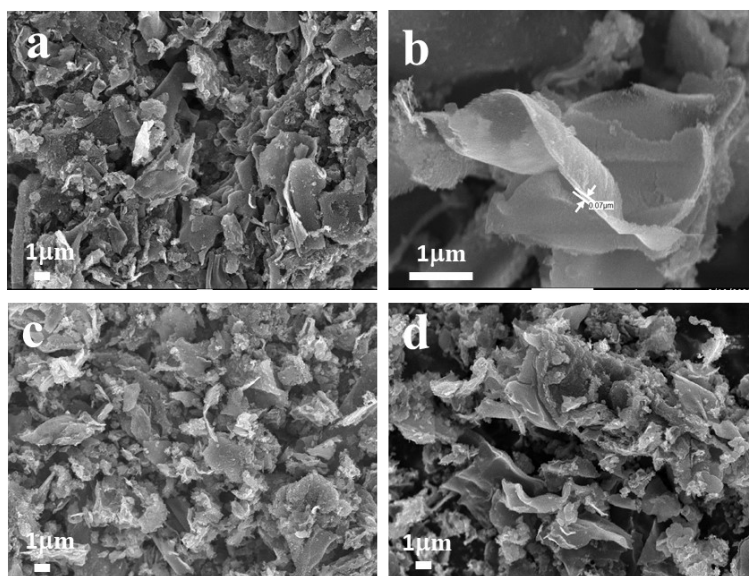

**Fig. S1** SEM images of (a, b) NCNS-12, (c) NCNS-11 and (d) NCNS-14.

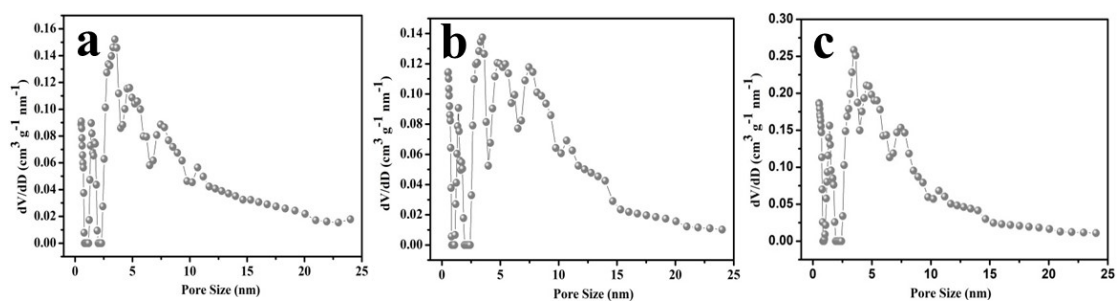

**Fig. S2** Pore size distribution curves of: (a) NCNS-11, (b) NCNS-12 and (c) NCNS-14.

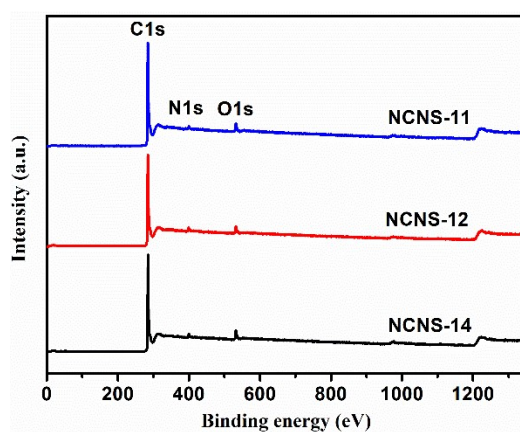

**Fig. S3** XPS survey spectra of NCNS-11, NCNS-12 and NCNS-14.

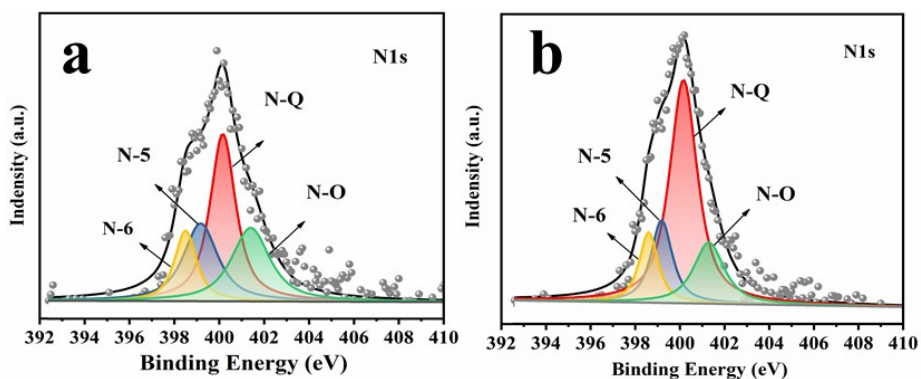

**Fig. S4** Atomic contents of pyridinic nitrogen (N-6), pyridinic nitrogen (N-5), quaternary nitrogen (N-Q) and oxidized N (N-O): (a) NCNS-11, (b) NCNS-14.

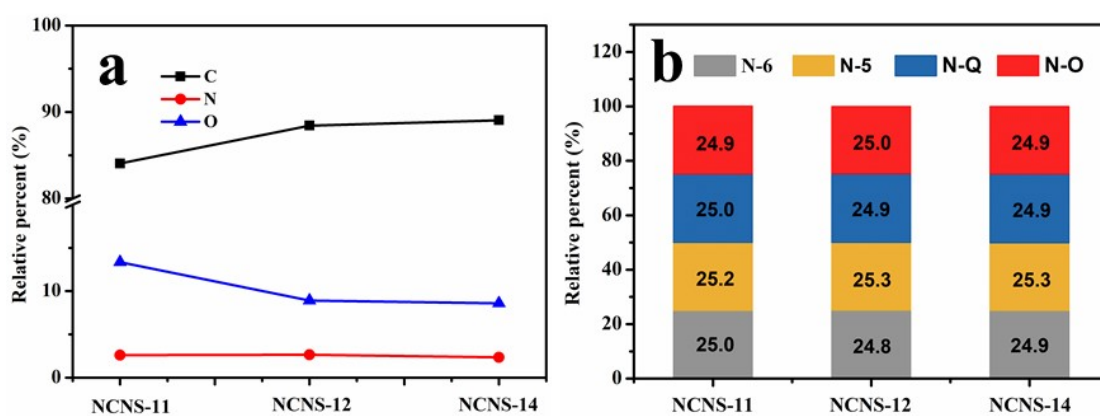

**Fig. S5** Surface elemental characterization (a) elements contents of C, O, N from the combustion method, (b) atomic contents of pyridinic nitrogen (N-6), pyridinic nitrogen (N-5), quaternary nitrogen (N-Q) and oxidized N (N-O) based on the analysis of XPS.

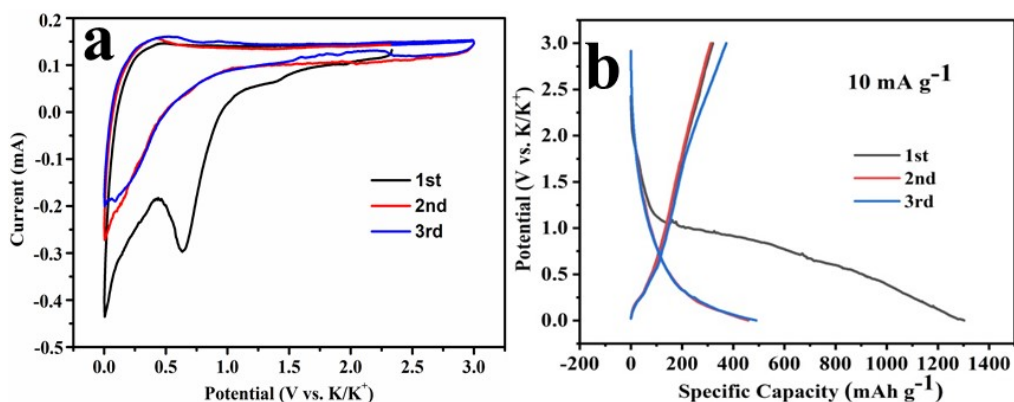

**Fig. S6** Electrochemical property of NCNS-12: (a) CV curves at  $0.1 \text{ mV s}^{-1}$ , (b) charge-discharge profiles at  $10 \text{ mA g}^{-1}$ .

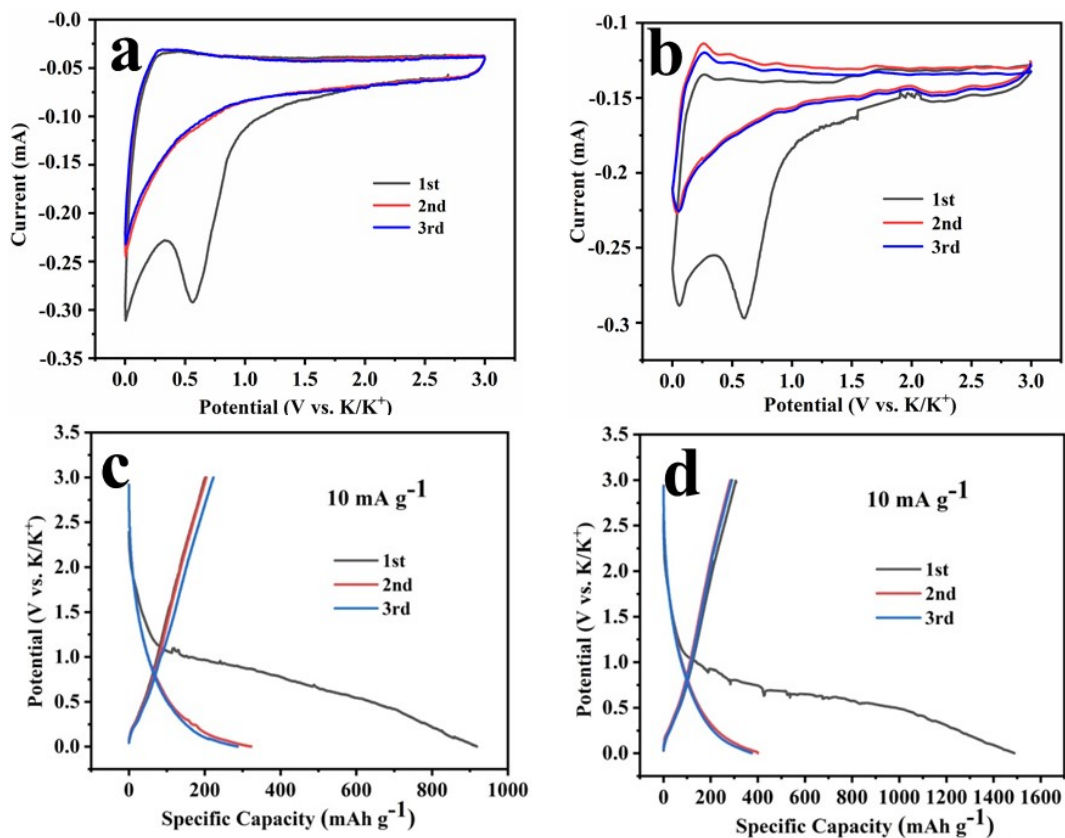

**Fig. S7** Electrochemical property of NCNS-11, NCNS-14: CV at  $0.1 \text{ mV s}^{-1}$  (a) NCNS-11, (b) NCNS-14, charge–discharge profiles at  $10 \text{ mA g}^{-1}$  (c) NCNS-11, (d) NCNS-14.

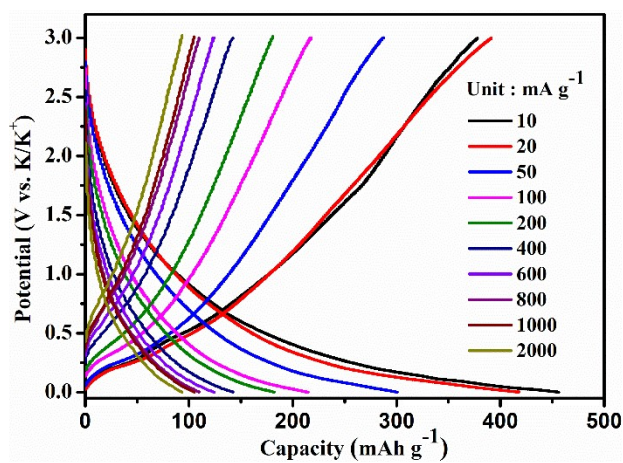

**Fig. S8** Charge and discharge profiles of NCNS-12 at various current densities.

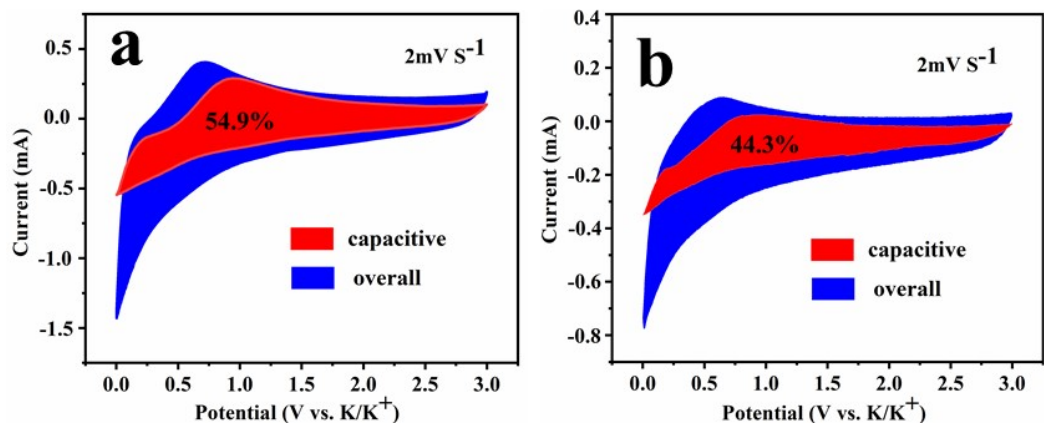

**Fig. S9** Capacitive contribution at 2 mV s<sup>-1</sup> (a) NCNS-11, (2) NCNS-14.

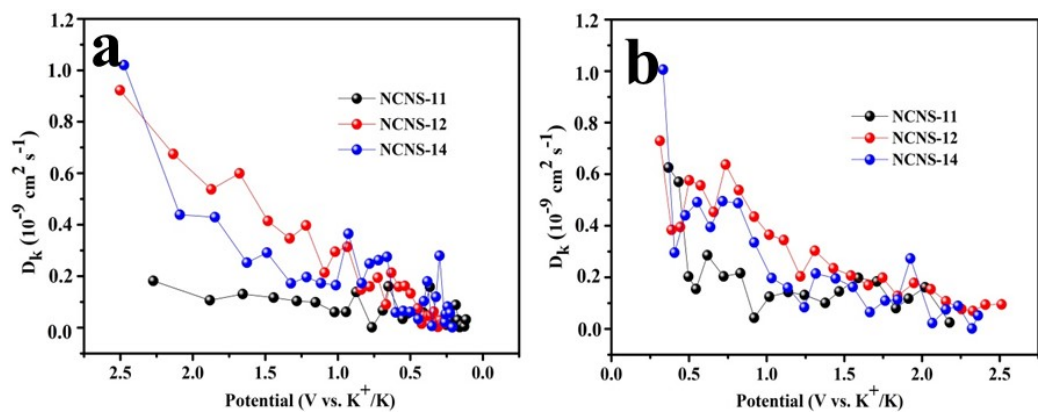

**Fig. S10** The K-ion diffusion coefficient during the GITT measurement: (a) discharge and (b) charge processes.

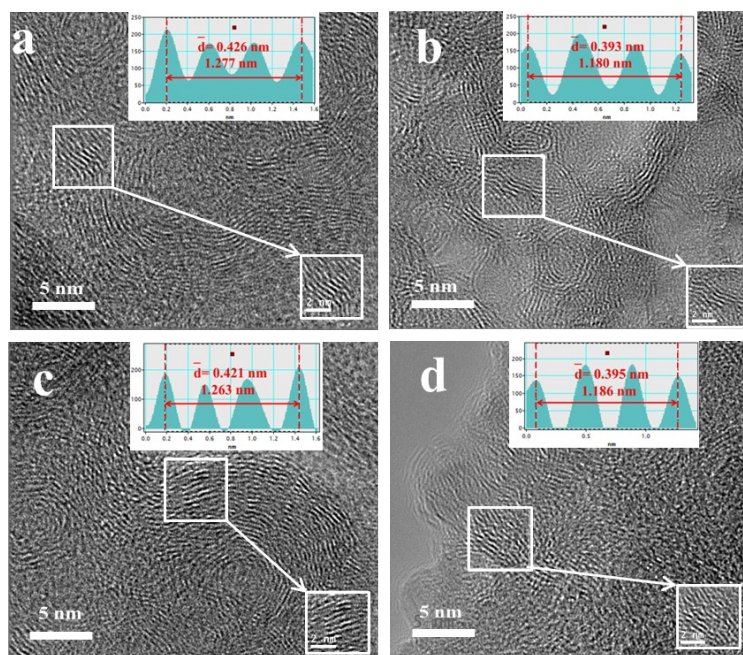

**Fig. S11** Ex situ HRTEM images of NCNS-12 at different states: (a) full potassiation and (b) full depotassiation state after 1 cycle ( $50 \text{ mA g}^{-1}$ ); (c) full potassiation and (d) full depotassiation state after 800 cycles ( $50 \text{ mA g}^{-1}$ ).

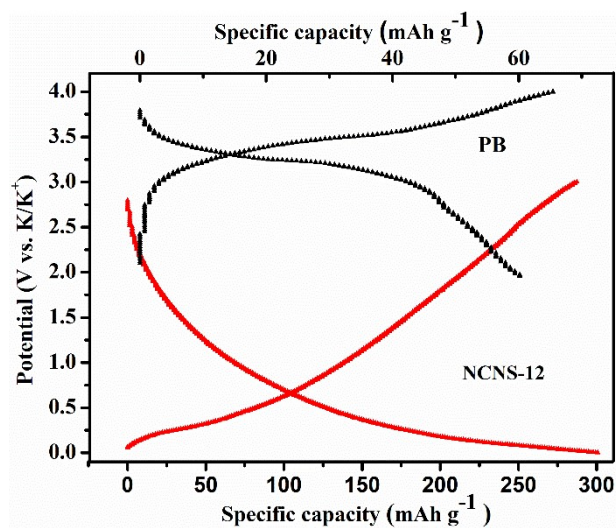

**Fig. S12** The charge/discharge curves of the NCNS-12 electrode and PB electrode at  $50 \text{ mA g}^{-1}$ .

**Tab. S1** Elemental content analysis by XPS measure of NCNS-11, NCNS-12, and NCNS-14.

| Sample  | C (at %) | O (at %) | N (at %) |
|---------|----------|----------|----------|
| NCNS-11 | 92.12    | 5.13     | 2.75     |
| NCNS-12 | 92.5     | 4.17     | 3.24     |
| NCNS-14 | 93.2     | 4.16     | 2.64     |

**Tab. S2** Elemental content measured by combustion method of NCNS-11, NCNS-12, and NCNS-14.

| Sample  | C (Wt %) | O (Wt %) | N (Wt %) |
|---------|----------|----------|----------|
| NCNS-11 | 84.05    | 13.35    | 2.6      |
| NCNS-12 | 88.43    | 8.92     | 2.65     |
| NCNS-14 | 89.05    | 8.6      | 2.35     |
